# Supplementary material
Source: PubMed Central journal article supplement (PMC6475090)
Supplement: NIHMS1016802-supplement-supplement.pdf [file NIHMS1016802-supplement-supplement.pdf]

**Supplementary Table 1: Specific Aspects of Fecal Microbiota Transplantation Requiring Targeted Study**

| <b>Aspect</b>                                | <b>Rationale</b>                                                                                                                                                                                                                                                                                                                                                                               |
|----------------------------------------------|------------------------------------------------------------------------------------------------------------------------------------------------------------------------------------------------------------------------------------------------------------------------------------------------------------------------------------------------------------------------------------------------|
| Donor selection                              | Microbiome analyses to seek particular organisms of value in specific disease state. Avoidance of potential microbiome transmissible disease states e.g. obesity.                                                                                                                                                                                                                              |
| Recipient selection and timing               | Identifying candidates with diseases amenable to FMT at the most appropriate stage of disease for this intervention (window of opportunity).                                                                                                                                                                                                                                                   |
| Matching of donor to recipient               | Identification of compatible microbial profiles between donor and host to support likelihood of engraftment.<br>Identification of particular microbial niche in recipient and appropriate colonisers in donor- may in some cases be individual-specific and not disease-specific, may be function-driven e.g. butyrate production in ulcerative colitis rather than genus or species-specific. |
| Induction treatment (pre-FMT)                | Deliberate alteration of recipient state to open up microbial niche for colonization (antibiotic +/- dietary alteration most likely) or to support early engraftment.                                                                                                                                                                                                                          |
| Support of graft longevity                   | The pre-treatment microbiome is host-specific and influenced by lifestyle parameters, particularly diet. The donor microbiome may not be inherently compatible with the host lifestyle; how can we modify and influence this to support engraftment and promote sustainability.                                                                                                                |
| Optimal method of administration             | Most commonly used are upper gastrointestinal (nasogastric or nasojejunal) or distal (colonoscopic or enema) - very little is known about optimal method but theoretically colonoscopic would allow greater dosing to the target organ, though this is costly, logistically challenging and may not always be necessary                                                                        |
| Treatment course (dose) of FMT and "top-ups" | As for other medical therapies, understanding the dose and duration of therapy needed to achieve the optimum balance of effect against risk/convenience.                                                                                                                                                                                                                                       |
| Markers of success- positive engraftment     | Moving beyond simple yes/no clinical parameters of success and on to an incorporation of whether or not the therapy was microbially successful (picking up weaker signals of success and optimising FMT protocols going forward).                                                                                                                                                              |
| Measures of sustained engraftment            | As the microbiome is in a constant state of challenge and flux, and distinct to the host, measures of longevity of engraftment will be important in looking at the duration of any efficacy seen in a particular indication. Can we alter long-term colonisation, and should we be aiming to do so?                                                                                            |

|                                                                          |                                                                                                                                                                                                                                                                                                                                                                               |
|--------------------------------------------------------------------------|-------------------------------------------------------------------------------------------------------------------------------------------------------------------------------------------------------------------------------------------------------------------------------------------------------------------------------------------------------------------------------|
| Novel FMT applications (pill-based, freeze-thawed FMT, multi-donor, etc) | Each new approach to the FMT itself warrants specific consideration in different disease indications.                                                                                                                                                                                                                                                                         |
| Choice of placebo                                                        | The choice of placebo is a challenge in FMT studies, particularly where blinding is desired/sought. Patient's own stool is not microbiologically inert, particularly if processed in any way or administered to a different site (nasogastric or nasoduodenal for example). A standardized approach to placebo for FMT studies would be a welcome addition to the literature. |

**Supplementary Table 2: Active pediatric FMT studies listed on ClinicalTrials.gov (accessed December 2017).**

| Condition | Identifier, lead center                       | Target cohort                                                   | Study design                        | Comparator                                     | Primary Outcome Measures                            | FMT method (Dosing)                | N  | Status          |
|-----------|-----------------------------------------------|-----------------------------------------------------------------|-------------------------------------|------------------------------------------------|-----------------------------------------------------|------------------------------------|----|-----------------|
| rCDI      | NCT02134392, Columbus, Ohio, USA              | Age 2-21, rCDI, need for colonoscopy                            | Open label, single group assignment | NA                                             | Resolution of <i>C. difficile</i> 6 months post-FMT | Colonoscopy or enema (single dose) | 15 | Recruiting      |
| rCDI      | NCT03117582, Chapel Hill, North Carolina, USA | Age 1-99, rCDI, not responding to antibiotics                   | Observational                       | NA                                             | Resolution of diarrhoea                             | Colonoscopy (single dose)          | NR | Invitation only |
| rCDI      | NCT03268213, Stony Brook, New York, USA       | Age $\geq$ 7, rCDI, not responding to antibiotics               | Open label, single group assignment | NA                                             | Safety and tolerability, efficacy                   | NR                                 | 50 | Recruiting      |
| rCDI      | NCT02423967, Rochester, Minnesota, USA        | Age 1-18, rCDI, not responding to antibiotics                   | Randomized, open label              | Fresh familial stool vs frozen anonymous stool | Recurrence of <i>C. difficile</i>                   | NR                                 | 40 | Recruiting      |
| rCDI      | NCT02636517, Philadelphia, Pennsylvania, USA  | Age 3–21, known IBD patients with rCDI (and non-IBD with rCDI)  | Non-randomized, open label          | Patients with CDI and no IBD                   | Recurrence of <i>C. difficile</i>                   | Colonoscopy (single dose)          | 50 | Recruiting      |
| CD        | NCT03194529, Los Angeles, California, USA     | Age 7-21, CD in remission (PCDAI <10), need for upper endoscopy | Open label, single group assignment | NA                                             | Safety                                              | Upper endoscopy (single dose)      | 10 | Recruiting      |
| CD        | NCT02330211                                   | Age 5-30, active Crohn's colitis (PCDAI >10)                    | Phase I/II, randomized              | Placebo                                        | Safety and tolerability,                            | Enema induction with               | 60 | Recruiting      |

|           |                                           |                                                                                                     |                                                                                                                          |                                         |                                            |                                                               |     |            |
|-----------|-------------------------------------------|-----------------------------------------------------------------------------------------------------|--------------------------------------------------------------------------------------------------------------------------|-----------------------------------------|--------------------------------------------|---------------------------------------------------------------|-----|------------|
|           | Boston, Massachusetts, USA                |                                                                                                     | placebo controlled                                                                                                       |                                         | improvement PDAI                           | capsule maintenance (weekly for 8 weeks)                      |     |            |
| CD        | NCT03267238, Stony Brook, New York, USA   | Age ≥7, CD relapse or treatment-refractory                                                          | Open label, single group assignment                                                                                      | NA                                      | Fecal Calprotectin                         | NR                                                            | 40  | Recruiting |
| UC        | NCT02291523, Los Angeles, California, USA | Age: 7-21, mild to moderate UC (PUCAI 10-64), need for colonoscopy                                  | Randomized placebo controlled                                                                                            | Autologous FMT                          | Disease remission                          | Colonoscopy (single dose)                                     | 101 | Recruiting |
| UC        | NCT02330653, Boston, Massachusetts, USA   | Age 5-30, active UC (PUCAI >9) and failed, intolerant to, or refused first-line maintenance therapy | Phase I/II, randomized placebo controlled                                                                                | Placebo                                 | Safety and tolerability, improvement PUCAI | Enema induction with capsule maintenance (weekly for 8 weeks) | 60  | Recruiting |
| UC        | NCT02033408 Jerusalem, Israel             | Age 2-75, acute severe colitis requiring iv steroids                                                | Randomized controlled trial: steroids ± antibiotics; Non-randomized, uncontrolled open-label arm: FMT for non-responders | Multiple groups: Steroids ± antibiotics | Disease activity                           | NR                                                            | 28  | Recruiting |
| UC, IBD-U | NCT02487238, Hamilton, Ontario, Canada    | Age 3-17, active UC or IBD-U on stable background therapy                                           | Single-blind, randomized placebo controlled                                                                              | Saline Enema                            | Feasibility                                | Enemas (dosing 12/6 weeks)                                    | 50  | Recruiting |

|             |                                       |                                                       |                                     |               |                            |                                |     |            |
|-------------|---------------------------------------|-------------------------------------------------------|-------------------------------------|---------------|----------------------------|--------------------------------|-----|------------|
| UC          | NCT01961492, Turku, Finland,          | Age 1-75, active UC (PUCAI 10-64)                     | Randomized, open label              | Standard care | Disease activity           | Colonoscopy (single dose)      | 40  | Recruiting |
| MDRO        | NCT02543866, Seattle, Washington, USA | Age 7-21, ≥1 infection with ESC-R Enterobacteriaceae. | Open label, single group assignment | NA            | Safety and Tolerability    | Nasogastric tube (single dose) | 20  | Recruiting |
| GvHD, acute | NCT03148743, Suzhou, Jiangsu, China   | Age 10-60, acute intestinal GvHD                      | Observational                       | NA            | Stool frequency            | NR                             | 20  | Recruiting |
| Epilepsy    | NCT02889627, Nanjing, Jiangsu, China  | Age 12-70, epilepsy with >1 seizure per 6 months      | Randomized placebo controlled       | Saline        | Frequency of the seizures. | Mid-gut infusion (single dose) | 100 | Recruiting |

An electronic search (<https://clinicaltrials.gov/ct2/home>) was conducted using search terms “FMT” or “fecal microbiota transplantation”. The following filter were applied: Recruiting; Enrolling by invitation; Active; not recruiting; Child (birth–17). Abbreviations: CD, Crohn’s disease; ESC-R, extended-spectrum resistant; IBD-U, IBD unclassified; NA, non-applicable; NR, not reported; PCDAI, Paediatric CD Activity Index; PUCAI, Pediatric UC activity index; UC, ulcerative colitis;
